# Supplementary material
Source: PubMed Central journal article supplement (PMC5914360)
Supplement: gzx051peds_supplementalmaterial.pdf [file gzx051peds_supplementalmaterial.pdf]

**Supplemental Figure & Table.**

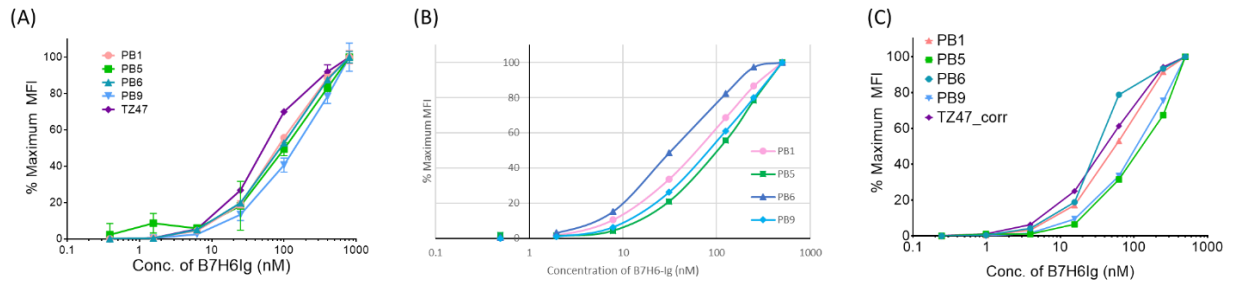

**Supplementary Figure S1.** Three biological replicate B7H6-Ig binding avidity titration curves of yeast-displayed PB clones using three separate batches of B7H6-Ig soluble antigen. Panel (A) shows the data depicted in Fig. 2B. Panels (B&C) depict earlier experiments suggesting that clone PB6 has the highest relative avidity among PB clones, although the lack of definitive saturation at tested B7H6-Ig concentrations in panels (A&B) make this interpretation somewhat tentative. Best-Fit KD estimates for each run are shown in Supplementary Table S1 below.

**Supplementary Table S1.** Best-fit KD values (nM units) calculated by one-site binding curve fit in GraphPad Prism of the three B7H6-Ig binding avidity experiments shown in Supp. Fig. S1, with “Run” titles corresponding to panel letter. Despite the lack of saturation, all KD fit curves had correlation coefficients  $R^2 > 0.96$ .

| Clone | Run A | Run B | Run C |
|-------|-------|-------|-------|
| PB1   | 109.5 | 12.66 | 97.19 |
| PB5   | 120.2 | 21.52 | 100.1 |
| PB6   | 110.0 | 9.51  | 53.15 |
| PB9   | 149.9 | 18.37 | 154.1 |
